# Supplementary material for: Online Measurement System for Dynamic Flow Bioreactors to Study Barrier Integrity of hiPSC-Based Blood–Brain Barrier In Vitro Models
Source: MDPI journal article supplement (doi:10.3390/bioengineering9010039), 2022-01-16
Supplement: s1 [file s1]

Supplementary materials

# Online Measurement System for Dynamic Flow Bioreactors to Study Barrier Integrity of hiPSC-Based Blood–Brain Barrier In Vitro Models

Jihyoung Choi <sup>1,‡, \*</sup>, Sanjana Mathew <sup>1,‡</sup>, Sabrina Oerter <sup>2</sup>, Antje Appelt-Menzel <sup>1,2\*</sup>, Jan Hansmann <sup>1,3</sup> and Tobias Schmitz <sup>1</sup>

<sup>1</sup> Department of Tissue Engineering and Regenerative Medicine, University Hospital Würzburg, Röntgenring 11, 97070 Würzburg, Germany; sanjana.mathew@uni-wuerzburg.de (S.M.); Jan.Hansmann@uni-wuerzburg.de (J.H.); tobias.schmitz@uni-wuerzburg.de (T.S.)

<sup>2</sup> Translational Center for Regenerative Therapies, Fraunhofer Institute for Silicate Research, Röntgenring 11, 97070 Würzburg, Germany; sabrina.oerter@isc.fraunhofer.de

<sup>3</sup> Faculty of Electronics, University of Applied Science Würzburg-Schweinfurt, Ignaz-Schön-Straße 11, 97421 Schweinfurt, Germany

\* Correspondence: jihyoung.choi@uni-wuerzburg.de (J.C.); antje.appelt-menzel@uni-wuerzburg.de (A.A.-M.)

† These authors contributed equally to this work

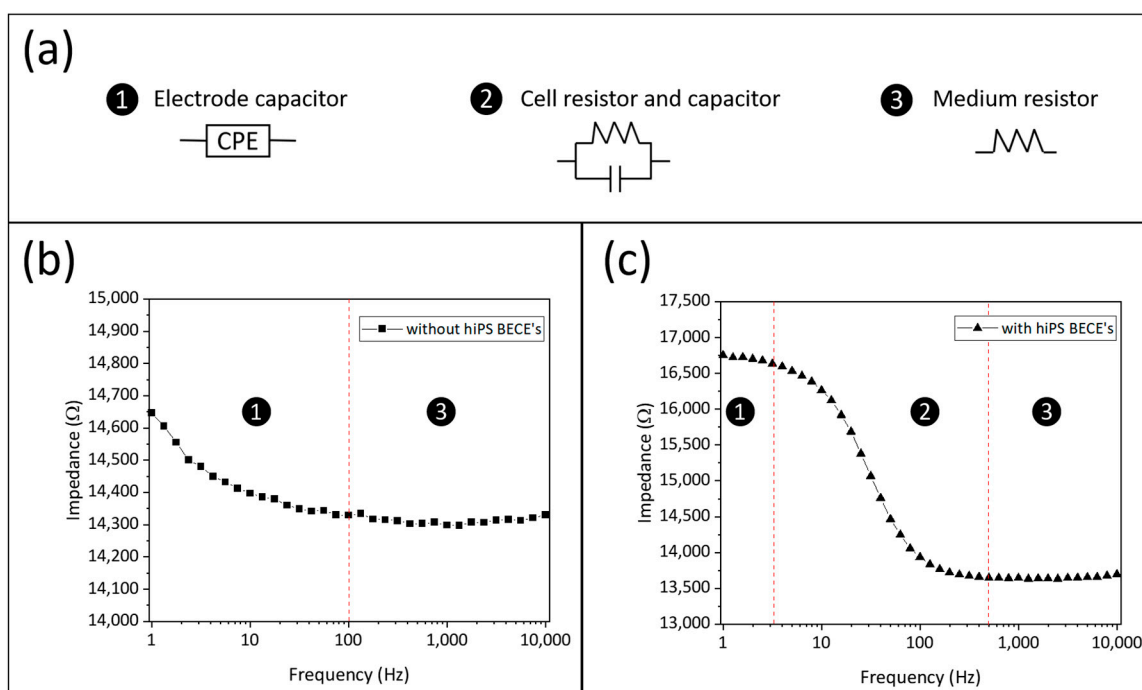

**Figure S1.** Equivalent circuit elements that represent the chip bioreactor system. (a) Three main elements of equivalent circuits representing the bioreactor cell culture system. Comparison between EIS measurement (b) without hiPSC-derived BCECs and (c) with hiPSC-derived BCECs culture on porous membrane in chip bioreactor system. The simulated electronic parameters for the CPE in the dynamic system were: Exponent of CPE  $N = 0.65 \pm 0.09$  and coefficient of CPE  $Y_0 = 88.4 \pm 44.2 \cdot 10^{-5} \Omega^{-1} \cdot s^N \cdot cm^2$ .

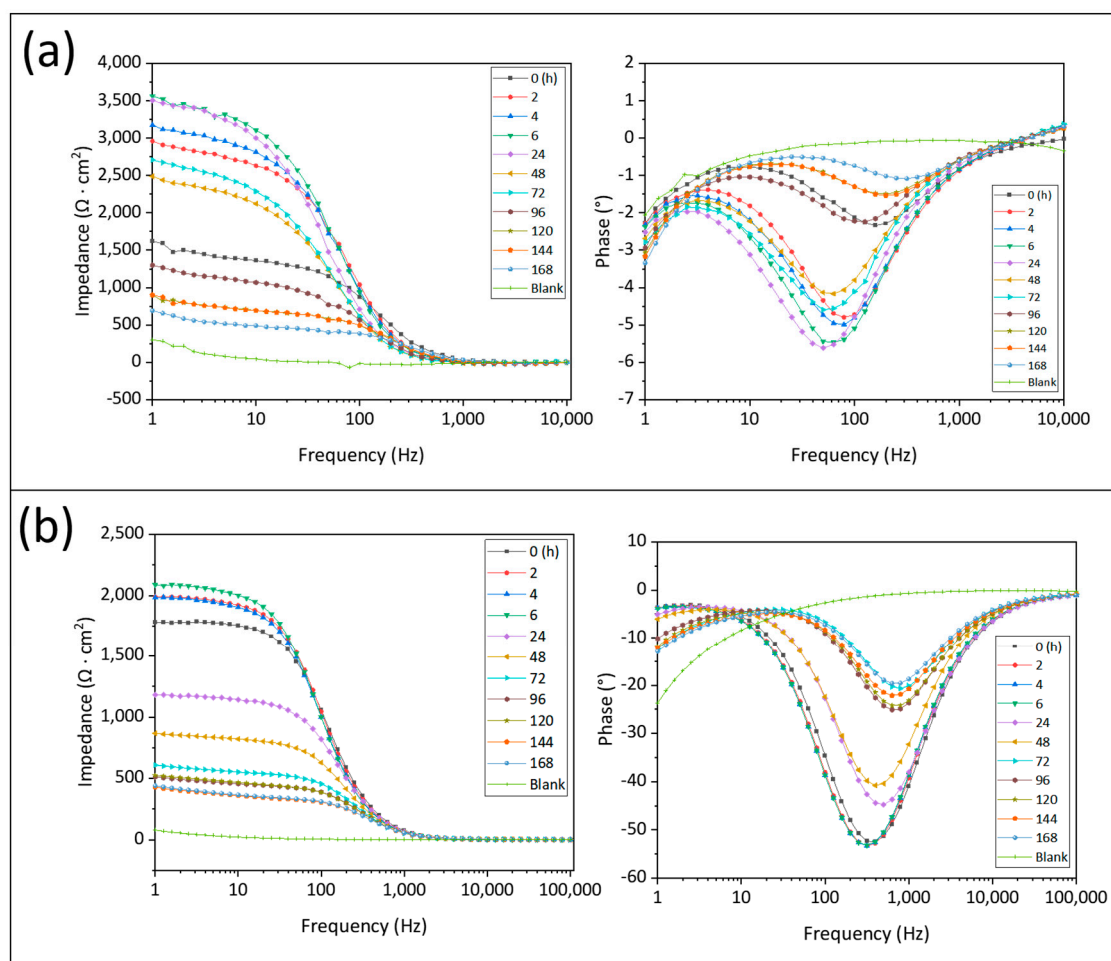

**Figure S2.** Impedance of frequency response was represented in Bode plot. We subtracted baseline and then normalized impedance value by porous membrane area (dynamic culture  $\sim 0.95 \text{ cm}^2$ , static culture  $\sim 0.33 \text{ cm}^2$ ) for better comparison. EIS measurement carried out at time points (0, 2, 4, 6, 24, 48, 72, 96, 120, 144, and 168 h) for 168 h BCECs culture (a) in dynamic culture condition and (b) static culture condition. The simulated electronic parameters for the CPE in the static system were: Exponent of CPE  $N = 0.39 \pm 0.06$  and coefficient of CPE  $Y_0 = 85.3 \pm 39.1 \cdot 10^{-5} \Omega^{-1} \cdot \text{s}^N \cdot \text{cm}^2$ .

**Table S1.** Overview of transendothelial electrical resistances (*TEER*) and cell membrane capacitance ( $C_c$ ) of BCECs in static culture in transwells and dynamic culture in bioreactor system. Cellular barrier impedance was monitored by EIS. *TEER* and  $C_c$  were quantified by fitting equivalent circuits. 168 h dynamic and static culture ( $N = 3$ ). 48 h dynamic and static culture ( $N = 4$ ), resulting in ( $N = 7$ ) for all measurement time points until 48 h.

| Culture time (h) | <i>TEER</i> <sub>simulation</sub> ( $\Omega \cdot \text{cm}^2$ ) |       |                |       | $C_c / A_{\text{membrane}}$ ( $\mu\text{F}/\text{cm}^2$ ) |      |                |      |
|------------------|------------------------------------------------------------------|-------|----------------|-------|-----------------------------------------------------------|------|----------------|------|
|                  | Dynamic culture                                                  |       | Static culture |       | Dynamic culture                                           |      | Static culture |      |
|                  | Mean                                                             | SD    | Mean           | SD    | Mean                                                      | SD   | Mean           | SD   |
| 0                | 1,042                                                            | 433   | 3,411          | 1,779 | 1.18                                                      | 0.41 | 1.59           | 0.58 |
| 2                | 2,108                                                            | 762   | 3,143          | 1,984 | 1.06                                                      | 0.35 | 1.63           | 0.58 |
| 4                | 2,431                                                            | 1,037 | 3,219          | 1,992 | 1.11                                                      | 0.37 | 1.68           | 0.59 |
| 6                | 2,609                                                            | 1,029 | 3,010          | 2,008 | 1.16                                                      | 0.37 | 1.69           | 0.58 |
| 24               | 2,513                                                            | 424   | 1,865          | 786   | 1.47                                                      | 0.36 | 1.68           | 0.47 |
| 48               | 1,733                                                            | 785   | 1,129          | 451   | 1.44                                                      | 0.31 | 2.04           | 0.73 |
| 72               | 1,165                                                            | 762   | 860            | 358   | 1.31                                                      | 0.05 | 2.05           | 0.33 |
| 96               | 641                                                              | 219   | 697            | 244   | 1.36                                                      | 0.07 | 2.25           | 0.56 |
| 120              | 550                                                              | 232   | 706            | 336   | 1.45                                                      | 0.04 | 2.09           | 0.29 |
| 144              | 437                                                              | 176   | 648            | 298   | 1.51                                                      | 0.23 | 2.06           | 0.26 |
| 168              | 285                                                              | 76    | 449            | 149   | 1.49                                                      | 0.11 | 2.02           | 0.22 |
